# Supplementary material for: Cell-autonomous and non-cell autonomous effects of neuronal BIN1 loss in vivo
Source: PLoS One. 2019 Aug 13;14(8):e0220125. doi: 10.1371/journal.pone.0220125 (PMC6692034; doi:10.1371/journal.pone.0220125)
Supplement: S1 Table — RNAseq gene expression analysis of microglia from Bin1flox/flox:: Thy1-Cre+, Bin1flox/+:: Thy1-Cre 1-Cre+ and Bin1flox/+:: Thy1-Cre 1-Cre- males and females mice at 3 months of age. (XLSX) [file pone.0220125.s011.xlsx]

## Sheet: Sheet1
geneid	GeneName	GeneDescription	log2FoldChange	FoldChange	pvalue	padj
ENSMUSG00000070873.5	Lilra5	leukocyte immunoglobulin-like receptor, subfamily A (with TM domain), member 5	1.421	2.6777	3.7602e-21	9.7232e-18
ENSMUSG00000035385.5	Ccl2	chemokine (C-C motif) ligand 2	1.2619	2.398	2.3707e-15	2.8294e-12
ENSMUSG00000087259.5	2610035D17Rik	RIKEN cDNA 2610035D17 gene	1.2212	2.3314	1.2964e-13	1.1174e-10
ENSMUSG00000000982.5	Ccl3	chemokine (C-C motif) ligand 3	1.1832	2.2708	5.2732e-13	3.5571e-10
ENSMUSG00000069516.7	Lyz2	lysozyme 2	1.1523	2.2227	1.703e-22	5.2845e-19
ENSMUSG00000035356.14	Nfkbiz	nuclear factor of kappa light polypeptide gene enhancer in B cells inhibitor, zeta	1.1187	2.1715	8.8961e-13	5.3086e-10
ENSMUSG00000060586.10	H2-Eb1	histocompatibility 2, class II antigen E beta	1.0533	2.0753	1.5184e-10	4.3626e-08
ENSMUSG00000037868.13	Egr2	early growth response 2	1.0051	2.007	1.1037e-09	2.1405e-07
ENSMUSG00000036594.12	H2-Aa	histocompatibility 2, class II antigen A, alpha	1.0009	2.0013	1.0934e-09	2.1405e-07
ENSMUSG00000049103.11	Ccr2	chemokine (C-C motif) receptor 2	0.972	1.9615	3.7257e-11	1.3443e-08
ENSMUSG00000018930.3	Ccl4	chemokine (C-C motif) ligand 4	0.9695	1.9581	4.0634e-09	5.6845e-07
ENSMUSG00000024044.13	Epb4.1l3	erythrocyte protein band 4.1-like 3	0.9518	1.9343	1.1806e-09	2.2069e-07
ENSMUSG00000035352.3	Ccl12	chemokine (C-C motif) ligand 12	0.9447	1.9248	9.4594e-09	1.0644e-06
ENSMUSG00000027221.5	Chst1	carbohydrate (keratan sulfate Gal-6) sulfotransferase 1	0.9413	1.9202	8.3111e-09	9.5743e-07
ENSMUSG00000044786.5	Zfp36	zinc finger protein 36	0.9301	1.9054	9.4673e-09	1.0644e-06
ENSMUSG00000032841.13	Prr5l	proline rich 5 like	0.9198	1.8919	1.0465e-08	1.1516e-06
ENSMUSG00000073421.5	H2-Ab1	histocompatibility 2, class II antigen A, beta 1	0.9158	1.8866	2.5389e-09	4.0195e-07
ENSMUSG00000035373.2	Ccl7	chemokine (C-C motif) ligand 7	0.9145	1.885	1.1433e-09	2.1633e-07
ENSMUSG00000003541.6	Ier3	immediate early response 3	0.8864	1.8486	4.0669e-09	5.6845e-07
ENSMUSG00000059089.4	Fcgr4	Fc receptor, IgG, low affinity IV	0.8698	1.8274	8.2417e-08	6.6254e-06
ENSMUSG00000058385.7	Hist1h2bg	histone cluster 1, H2bg	0.8469	1.7987	2.2386e-08	2.1573e-06
ENSMUSG00000052837.5	Junb	jun B proto-oncogene	0.8459	1.7974	1.0395e-07	8.0641e-06
ENSMUSG00000053113.3	Socs3	suppressor of cytokine signaling 3	0.8378	1.7873	2.2159e-07	1.4788e-05
ENSMUSG00000084803.6	5830444B04Rik	RIKEN cDNA 5830444B04 gene	0.8301	1.7779	1.2673e-07	9.3628e-06
ENSMUSG00000052684.4	Jun	jun proto-oncogene	0.8277	1.7749	1.0234e-08	1.1342e-06
ENSMUSG00000026628.11	Atf3	activating transcription factor 3	0.8088	1.7518	5.3883e-09	7.0847e-07
ENSMUSG00000027399.1	Il1a	interleukin 1 alpha	0.8082	1.751	1.3227e-15	1.7101e-12
ENSMUSG00000035299.14	Mid1	midline 1	0.7949	1.735	7.7341e-07	3.9446e-05
ENSMUSG00000056209.7	Npm3	nucleoplasmin 3	0.7896	1.7286	6.7037e-07	3.5546e-05
ENSMUSG00000024640.7	Psat1	phosphoserine aminotransferase 1	0.7894	1.7284	3.7669e-07	2.1971e-05
ENSMUSG00000025085.14	Ablim1	actin-binding LIM protein 1	0.7856	1.7239	1.363e-06	6.0766e-05
ENSMUSG00000019173.9	Rab5c	RAB5C, member RAS oncogene family	0.7852	1.7233	1.7195e-09	2.9316e-07
ENSMUSG00000056313.5	1810011O10Rik	RIKEN cDNA 1810011O10 gene	0.7847	1.7228	5.1758e-07	2.8375e-05
ENSMUSG00000059248.11	Sept9	septin 9	0.7712	1.7067	2.9988e-09	4.5416e-07
ENSMUSG00000097039.6	Pvt1	plasmacytoma variant translocation 1	0.77	1.7052	3.4931e-09	5.1614e-07
ENSMUSG00000025746.9	Il6	interleukin 6	0.7687	1.7037	2.2798e-07	1.4988e-05
ENSMUSG00000060591.8	Ifitm2	interferon induced transmembrane protein 2	0.7671	1.7019	1.3941e-06	6.1697e-05
ENSMUSG00000025492.6	Ifitm3	interferon induced transmembrane protein 3	0.7578	1.6909	2.1965e-07	1.4753e-05
ENSMUSG00000070392.4	Gm20634		0.7566	1.6895	1.0466e-06	5.0119e-05
ENSMUSG00000036181.2	Hist1h1c	histone cluster 1, H1c	0.7484	1.6799	5.3039e-06	0.0002
ENSMUSG00000023960.11	Enpp5	ectonucleotide pyrophosphatase/phosphodiesterase 5	0.7438	1.6746	6.827e-07	3.6028e-05
ENSMUSG00000024766.12	Lipo1	lipase, member O1	0.7407	1.6709	3.5385e-10	8.8549e-08
ENSMUSG00000040435.10	Ppp1r15a	protein phosphatase 1, regulatory (inhibitor) subunit 15A	0.7397	1.6698	3.1763e-06	0.0001
ENSMUSG00000069273.2	Hist1h3e	histone cluster 1, H3e	0.7329	1.662	1.0818e-08	1.1737e-06
ENSMUSG00000103165.1	Gm37560		0.7311	1.6599	2.1747e-07	1.467e-05
ENSMUSG00000079293.9	Clec7a	C-type lectin domain family 7, member a	0.7272	1.6554	4.6258e-06	0.0002
ENSMUSG00000022150.14	Dab2	disabled 2, mitogen-responsive phosphoprotein	0.7255	1.6535	6.377e-09	7.7946e-07
ENSMUSG00000043794.7	D830025C05Rik	RIKEN cDNA D830025C05 gene	0.7251	1.653	1.0355e-05	0.0003
ENSMUSG00000024610.12	Cd74	CD74 antigen (invariant polypeptide of major histocompatibility complex, class II antigen-associated)	0.7221	1.6496	2.554e-06	9.9311e-05
ENSMUSG00000069272.5	Hist1h2ae	histone cluster 1, H2ae	0.7215	1.6489	1.1327e-05	0.0003
ENSMUSG00000093622.1	Gm20703		0.7211	1.6484	4.1038e-06	0.0001
ENSMUSG00000030577.11	Cd22	CD22 antigen	0.7209	1.6483	1.1086e-06	5.1808e-05
ENSMUSG00000042677.7	Zc3h12a	zinc finger CCCH type containing 12A	0.7205	1.6478	4.034e-09	5.6845e-07
ENSMUSG00000053560.4	Ier2	immediate early response 2	0.72	1.6472	2.9072e-08	2.7009e-06
ENSMUSG00000050335.14	Lgals3	lectin, galactose binding, soluble 3	0.7186	1.6456	7.8547e-06	0.0002
ENSMUSG00000021411.13	Pxdc1	PX domain containing 1	0.7186	1.6456	2.3575e-07	1.524e-05
ENSMUSG00000073018.4	Gm1070	predicted gene 1070	0.7119	1.6379	1.0387e-05	0.0003
ENSMUSG00000092274.2	Neat1	nuclear paraspeckle assembly transcript 1 (non-protein coding)	0.7093	1.635	9.354e-09	1.0644e-06
ENSMUSG00000066042.4	Med18	mediator complex subunit 18	0.7087	1.6344	4.6624e-07	2.6305e-05
ENSMUSG00000040663.8	Clcf1	cardiotrophin-like cytokine factor 1	0.7075	1.6329	4.0325e-11	1.4219e-08
ENSMUSG00000015312.8	Gadd45b	growth arrest and DNA-damage-inducible 45 beta	0.7065	1.6319	1.0362e-05	0.0003
ENSMUSG00000027368.6	Dusp2	dual specificity phosphatase 2	0.7058	1.6311	1.1301e-06	5.2498e-05
ENSMUSG00000071076.5	Jund	jun D proto-oncogene	0.7056	1.6308	1.803e-05	0.0005
ENSMUSG00000040829.12	Zmynd15	zinc finger, MYND-type containing 15	0.7036	1.6285	8.0323e-06	0.0002
ENSMUSG00000052102.12	Gnpda1	glucosamine-6-phosphate deaminase 1	0.7001	1.6246	3.1443e-24	1.2196e-20
ENSMUSG00000052776.10	Oas1a	2'-5' oligoadenylate synthetase 1A	0.6982	1.6225	8.2993e-06	0.0003
ENSMUSG00000072612.2	Gm10382	predicted gene 10382	0.6969	1.621	7.3387e-07	3.7702e-05
ENSMUSG00000045932.10	Ifit2	interferon-induced protein with tetratricopeptide repeats 2	0.6956	1.6196	6.6997e-06	0.0002
ENSMUSG00000068129.5	Cst7	cystatin F (leukocystatin)	0.6929	1.6165	7.0357e-07	3.6631e-05
ENSMUSG00000080058.1	Gm11175	predicted gene 11175	0.6921	1.6157	2.1036e-05	0.0005
ENSMUSG00000027398.11	Il1b	interleukin 1 beta	0.6918	1.6153	2.7341e-05	0.0006
ENSMUSG00000024235.8	Map3k8	mitogen-activated protein kinase kinase kinase 8	0.6906	1.6139	1.0391e-06	4.9914e-05
ENSMUSG00000087362.5	Gm13710	predicted gene 13710	0.6881	1.6112	2.5671e-05	0.0006
ENSMUSG00000059436.10	Max	Max protein	0.6856	1.6084	3.6084e-06	0.0001
ENSMUSG00000030214.4	Plbd1	phospholipase B domain containing 1	0.6835	1.606	2.293e-05	0.0005
ENSMUSG00000091754.6	Gm3636	predicted gene 3636	0.6812	1.6035	2.4701e-06	9.7267e-05
ENSMUSG00000022346.12	Myc	myelocytomatosis oncogene	0.6809	1.6032	5.191e-08	4.5502e-06
ENSMUSG00000085156.5	Gm11974	predicted gene 11974	0.6805	1.6027	5.412e-06	0.0002
ENSMUSG00000089672.4	Gp49a		0.6799	1.602	3.4103e-05	0.0007
ENSMUSG00000103593.1	Gm37352		0.6787	1.6007	3.351e-05	0.0007
ENSMUSG00000096401.2	Gm21811		0.6712	1.5924	1.418e-05	0.0004
ENSMUSG00000086763.1	Plxna4os1	plexin A4, opposite strand 1	0.669	1.5899	2.1465e-07	1.4607e-05
ENSMUSG00000079017.3	Ifi27l2a	interferon, alpha-inducible protein 27 like 2A	0.6676	1.5884	6.3989e-06	0.0002
ENSMUSG00000032845.13	Alpk2	alpha-kinase 2	0.6632	1.5835	8.7003e-07	4.3404e-05
ENSMUSG00000085498.1	Gm14023	predicted gene 14023	0.6613	1.5815	5.9838e-05	0.0012
ENSMUSG00000047150.8	1700001C19Rik	RIKEN cDNA 1700001C19 gene	0.6607	1.5808	4.4148e-05	0.0009
ENSMUSG00000030187.13	Klra2	killer cell lectin-like receptor, subfamily A, member 2	0.6599	1.58	2.8463e-06	0.0001
ENSMUSG00000036931.12	Nfkbid	nuclear factor of kappa light polypeptide gene enhancer in B cells inhibitor, delta	0.6581	1.578	1.3498e-06	6.0659e-05
ENSMUSG00000034653.9	Ythdc2	YTH domain containing 2	0.6558	1.5755	7.6694e-06	0.0002
ENSMUSG00000016559.12	H3f3b	H3 histone, family 3B	0.6556	1.5753	2.261e-05	0.0005
ENSMUSG00000046223.9	Plaur	plasminogen activator, urokinase receptor	0.6539	1.5734	3.4981e-06	0.0001
ENSMUSG00000024401.12	Tnf	tumor necrosis factor	0.648	1.567	9.2108e-06	0.0003
ENSMUSG00000058755.3	Osm	oncostatin M	0.6475	1.5664	1.0326e-06	4.9752e-05
ENSMUSG00000021684.14	Pde8b	phosphodiesterase 8B	0.6473	1.5662	3.9466e-10	9.5674e-08
ENSMUSG00000000058.6	Cav2	caveolin 2	0.6456	1.5644	2.0432e-06	8.342e-05
ENSMUSG00000100029.1	Gm29440		0.6437	1.5623	8.2774e-05	0.0015
ENSMUSG00000099470.1	Gm29340		0.6433	1.5619	7.2813e-05	0.0014
ENSMUSG00000051627.2	Hist1h1e	histone cluster 1, H1e	0.6424	1.5609	8.9846e-05	0.0016
ENSMUSG00000044337.5	Ackr3	atypical chemokine receptor 3	0.636	1.554	9.346e-05	0.0016
ENSMUSG00000027506.13	Tpd52	tumor protein D52	0.6342	1.5521	5.7124e-13	3.6928e-10
ENSMUSG00000063954.7	Hist2h2aa2	histone cluster 2, H2aa2	0.6321	1.5498	4.1987e-05	0.0009
ENSMUSG00000002602.14	Axl	AXL receptor tyrosine kinase	0.6318	1.5495	1.5838e-06	6.922e-05
ENSMUSG00000004707.12	Ly9	lymphocyte antigen 9	0.6315	1.5492	3.5195e-05	0.0008
ENSMUSG00000028214.11	Gem	GTP binding protein (gene overexpressed in skeletal muscle)	0.6294	1.5469	0.0001	0.0022
ENSMUSG00000105440.1	RP23-458I4.3		0.6284	1.5458	3.1517e-05	0.0007
ENSMUSG00000085385.5	Snhg17		0.6278	1.5452	1.0657e-06	5.0873e-05
ENSMUSG00000091421.3	Gm4202	tyrosine 3-monooxygenase/tryptophan 5-monooxygenase activation protein, beta polypeptide pseudogene	0.6273	1.5447	2.9221e-05	0.0007
ENSMUSG00000072731.6	Gm3715	predicted gene 3715	0.6267	1.544	0.0001	0.0022
ENSMUSG00000070942.6	Il1rl2	interleukin 1 receptor-like 2	0.6249	1.5421	3.482e-08	3.1409e-06
ENSMUSG00000020227.8	Irak3	interleukin-1 receptor-associated kinase 3	0.6231	1.5402	2.1995e-05	0.0005
ENSMUSG00000033355.5	Rtp4	receptor transporter protein 4	0.6189	1.5357	1.5617e-08	1.6153e-06
ENSMUSG00000091993.2	B930036N10Rik	RIKEN cDNA B930036N10 gene	0.6177	1.5344	0.0002	0.0028
ENSMUSG00000096010.1	Hist4h4	histone cluster 4, H4	0.6173	1.534	3.047e-06	0.0001
ENSMUSG00000033949.9	Trim36	tripartite motif-containing 36	0.6156	1.5322	8.3666e-07	4.2146e-05
ENSMUSG00000075010.4	AW112010	expressed sequence AW112010	0.6143	1.5308	1.3084e-05	0.0004
ENSMUSG00000032369.11	Plscr1	phospholipid scramblase 1	0.6121	1.5285	0.0002	0.003
ENSMUSG00000043263.11	Pyhin1	pyrin and HIN domain family, member 1	0.6103	1.5266	2.3142e-05	0.0006
ENSMUSG00000074506.4	Gm10705	predicted gene 10705	0.6082	1.5244	0.0002	0.0026
ENSMUSG00000027597.13	Ahcy	S-adenosylhomocysteine hydrolase	0.6064	1.5224	0.0002	0.0031
ENSMUSG00000001964.12	Emd	emerin	0.6061	1.5221	3.0951e-05	0.0007
ENSMUSG00000049744.13	Arhgap15	Rho GTPase activating protein 15	0.6058	1.5218	0.0002	0.0032
ENSMUSG00000057596.11	Trim30d	tripartite motif-containing 30D	0.6052	1.5212	5.2913e-06	0.0002
ENSMUSG00000052942.11	Glis3	GLIS family zinc finger 3	0.6049	1.5208	9.4446e-07	4.6114e-05
ENSMUSG00000035678.7	Tnfsf9	tumor necrosis factor (ligand) superfamily, member 9	0.6027	1.5186	9.8145e-05	0.0017
ENSMUSG00000085636.1	Gm11769		0.5998	1.5155	0.0003	0.0038
ENSMUSG00000035004.2	Igsf6	immunoglobulin superfamily, member 6	0.5991	1.5147	5.5355e-10	1.263e-07
ENSMUSG00000027712.11	Anxa5	annexin A5	0.5987	1.5143	1.5804e-06	6.922e-05
ENSMUSG00000093577.1	Gm20632		0.5976	1.5132	0.0002	0.0031
ENSMUSG00000087178.5	A230056P14Rik	RIKEN cDNA A230056P14 gene	0.5955	1.511	8.8608e-06	0.0003
ENSMUSG00000097643.1	A130051J06Rik	RIKEN cDNA A130051J0 gene	0.5942	1.5096	0.0003	0.0041
ENSMUSG00000049124.3	Gm8186	small nuclear ribonucleoprotein polypeptide G pseudogene	0.5926	1.508	7.3131e-06	0.0002
ENSMUSG00000014158.9	Trpv4	transient receptor potential cation channel, subfamily V, member 4	0.592	1.5074	0.0003	0.0043
ENSMUSG00000097855.5	A930007I19Rik	RIKEN cDNA A930007I19 gene	0.5914	1.5068	0.0003	0.0045
ENSMUSG00000014198.13	Zfp385c	zinc finger protein 385C	0.5888	1.504	6.2714e-06	0.0002
ENSMUSG00000054455.4	Vapb	vesicle-associated membrane protein, associated protein B and C	0.5883	1.5035	7.1112e-07	3.69e-05
ENSMUSG00000066170.6	E230001N04Rik	RIKEN cDNA E230001N04 gene	-0.5858	-1.5009	0.0004	0.0048
ENSMUSG00000076281.1	Gm24270		-0.5861	-1.5011	0.0002	0.0028
ENSMUSG00000040697.8	Dnajc16	DnaJ (Hsp40) homolog, subfamily C, member 16	-0.5885	-1.5036	9.0942e-08	7.2357e-06
ENSMUSG00000086324.6	Gm15564		-0.5925	-1.5078	5.4366e-08	4.7387e-06
ENSMUSG00000034891.11	Sncb	synuclein, beta	-0.5931	-1.5085	6.4806e-05	0.0012
ENSMUSG00000030806.5	Stx1b	syntaxin 1B	-0.5988	-1.5144	7.9314e-06	0.0002
ENSMUSG00000002265.13	Peg3	paternally expressed 3	-0.5995	-1.5152	4.8398e-06	0.0002
ENSMUSG00000106636.1	RP23-370G17.4		-0.5996	-1.5153	0.0003	0.0036
ENSMUSG00000004383.15	Large	like-glycosyltransferase	-0.6008	-1.5166	7.2026e-09	8.5304e-07
ENSMUSG00000022537.15	Tmem44	transmembrane protein 44	-0.6023	-1.5182	2.4864e-09	3.977e-07
ENSMUSG00000055670.11	Zzef1	zinc finger, ZZ-type with EF hand domain 1	-0.6038	-1.5197	2.3087e-06	9.2231e-05
ENSMUSG00000038370.6	Pcp4l1	Purkinje cell protein 4-like 1	-0.604	-1.5199	2.1168e-05	0.0005
ENSMUSG00000024486.5	Hbegf	heparin-binding EGF-like growth factor	-0.6042	-1.5201	2.8331e-07	1.7443e-05
ENSMUSG00000102145.1	Gm38056		-0.6048	-1.5208	0.0002	0.0035
ENSMUSG00000073437.8	D330041H03Rik	RIKEN cDNA D330041H03 gene	-0.6065	-1.5225	1.7846e-05	0.0005
ENSMUSG00000030539.11	Sema4b	sema domain, immunoglobulin domain (Ig), transmembrane domain (TM) and short cytoplasmic domain, (semaphorin) 4B	-0.6067	-1.5228	5.6219e-09	7.3297e-07
ENSMUSG00000033065.11	Pfkm	phosphofructokinase, muscle	-0.6068	-1.5229	1.0948e-07	8.3674e-06
ENSMUSG00000021872.7	Rnase10	ribonuclease, RNase A family, 10 (non-active)	-0.6104	-1.5267	2.091e-05	0.0005
ENSMUSG00000020486.16	Sept4	septin 4	-0.6112	-1.5275	2.4603e-05	0.0006
ENSMUSG00000084401.1	Gm12586		-0.6115	-1.5278	1.872e-05	0.0005
ENSMUSG00000070348.4	Ccnd1	cyclin D1	-0.6139	-1.5303	9.4078e-05	0.0017
ENSMUSG00000044068.6	Zrsr1	zinc finger (CCCH type), RNA binding motif and serine/arginine rich 1	-0.614	-1.5305	5.5541e-05	0.0011
ENSMUSG00000048978.11	Nrsn1	neurensin 1	-0.6154	-1.532	2.6311e-05	0.0006
ENSMUSG00000003882.4	Il7r	interleukin 7 receptor	-0.6159	-1.5326	5.344e-09	7.0847e-07
ENSMUSG00000065145.1	Vaultrc5	vault RNA component 5	-0.6165	-1.5331	8.7993e-05	0.0016
ENSMUSG00000024456.14	Diap1	diaphanous homolog 1 (Drosophila)	-0.617	-1.5337	2.1418e-05	0.0005
ENSMUSG00000090257.1	Gm4524	predicted gene 4524	-0.6178	-1.5346	1.909e-05	0.0005
ENSMUSG00000027805.14	Pfn2	profilin 2	-0.6182	-1.535	4.7252e-05	0.001
ENSMUSG00000020108.3	Ddit4	DNA-damage-inducible transcript 4	-0.6186	-1.5354	0.0002	0.0027
ENSMUSG00000042644.8	Itpr3	inositol 1,4,5-triphosphate receptor 3	-0.6199	-1.5368	2.5507e-05	0.0006
ENSMUSG00000038886.9	Man2a2	mannosidase 2, alpha 2	-0.6213	-1.5382	3.5273e-06	0.0001
ENSMUSG00000105270.1	RP24-127J3.1		-0.6236	-1.5407	7.6367e-05	0.0014
ENSMUSG00000025579.12	Gaa	glucosidase, alpha, acid	-0.6251	-1.5424	3.2064e-10	8.1582e-08
ENSMUSG00000072214.6	Sept5	septin 5	-0.6285	-1.546	0.0001	0.002
ENSMUSG00000018593.10	Sparc	secreted acidic cysteine rich glycoprotein	-0.6287	-1.5461	1.0274e-24	5.3134e-21
ENSMUSG00000040481.14	Bptf	bromodomain PHD finger transcription factor	-0.6292	-1.5467	4.3543e-06	0.0001
ENSMUSG00000090223.1	Pcp4	Purkinje cell protein 4	-0.6294	-1.5469	0.0001	0.0022
ENSMUSG00000037347.7	Chst7	carbohydrate (N-acetylglucosamino) sulfotransferase 7	-0.6302	-1.5478	3.5526e-13	2.5054e-10
ENSMUSG00000050138.7	Kcnk12	potassium channel, subfamily K, member 12	-0.637	-1.5551	1.2944e-09	2.3627e-07
ENSMUSG00000058254.10	Tspan7	tetraspanin 7	-0.6372	-1.5553	1.0196e-15	1.4381e-12
ENSMUSG00000042333.12	Tnfrsf14	tumor necrosis factor receptor superfamily, member 14 (herpesvirus entry mediator)	-0.6375	-1.5557	0.0001	0.0019
ENSMUSG00000101493.1	2810405F17Rik	RIKEN cDNA 2810405F17 gene	-0.6382	-1.5563	1.5495e-06	6.8103e-05
ENSMUSG00000046805.9	Mpeg1	macrophage expressed gene 1	-0.6387	-1.5569	0.0001	0.0019
ENSMUSG00000038530.9	Rgs4	regulator of G-protein signaling 4	-0.6411	-1.5595	2.5447e-05	0.0006
ENSMUSG00000028641.14	P3h1		-0.6423	-1.5608	6.6292e-10	1.4486e-07
ENSMUSG00000048126.14	Col6a3	collagen, type VI, alpha 3	-0.6424	-1.561	1.438e-05	0.0004
ENSMUSG00000085622.6	3110056K07Rik	RIKEN cDNA 3110056K07 gene	-0.6429	-1.5615	6.9608e-06	0.0002
ENSMUSG00000097731.1	2700016F22Rik	ER membrane protein complex subunit 1	-0.6451	-1.5638	5.1683e-05	0.001
ENSMUSG00000103149.1	AA914427	EST AA914427	-0.6465	-1.5654	1.3367e-05	0.0004
ENSMUSG00000024754.10	Tmem2	transmembrane protein 2	-0.6468	-1.5657	1.9551e-05	0.0005
ENSMUSG00000035295.8	Wdr38	WD repeat domain 38	-0.649	-1.5681	3.803e-05	0.0008
ENSMUSG00000042082.6	Arsb	arylsulfatase B	-0.6492	-1.5683	4.6937e-05	0.001
ENSMUSG00000064945.1	Rny3	RNA, Y3 small cytoplasmic (associated with Ro protein)	-0.6498	-1.569	7.5112e-05	0.0014
ENSMUSG00000022311.13	Csmd3	CUB and Sushi multiple domains 3	-0.6515	-1.5708	3.9e-09	5.655e-07
ENSMUSG00000098108.5	Gm27008		-0.6565	-1.5763	4.5806e-05	0.0009
ENSMUSG00000038312.8	Edem2	ER degradation enhancer, mannosidase alpha-like 2	-0.6578	-1.5777	1.1777e-11	5.537e-09
ENSMUSG00000069899.3	Gm12166	SFT2 domain containing 1 pseudogene	-0.6614	-1.5816	4.8626e-07	2.7087e-05
ENSMUSG00000028040.7	Efna4	ephrin A4	-0.6625	-1.5828	5.6349e-05	0.0011
ENSMUSG00000018707.11	Dync1h1	dynein cytoplasmic 1 heavy chain 1	-0.6665	-1.5872	5.3132e-11	1.7549e-08
ENSMUSG00000040249.13	Lrp1	low density lipoprotein receptor-related protein 1	-0.6687	-1.5897	4.6369e-10	1.0785e-07
ENSMUSG00000030165.14	Klrd1	killer cell lectin-like receptor, subfamily D, member 1	-0.6692	-1.5902	4.4418e-05	0.0009
ENSMUSG00000060019.5	Gm10073	ribosomal protein, large, P1 pseudogene	-0.6697	-1.5908	4.9788e-05	0.001
ENSMUSG00000029765.12	Plxna4	plexin A4	-0.6748	-1.5964	7.151e-14	6.5263e-11
ENSMUSG00000105345.1	RP23-301L9.3	cDNA sequence BC030343	-0.6777	-1.5996	4.0501e-05	0.0009
ENSMUSG00000056145.5	AI504432	expressed sequence AI504432	-0.6778	-1.5997	3.5506e-05	0.0008
ENSMUSG00000037999.13	Arap2	ArfGAP with RhoGAP domain, ankyrin repeat and PH domain 2	-0.6846	-1.6073	1.9811e-07	1.3722e-05
ENSMUSG00000058317.9	Ube2e2	ubiquitin-conjugating enzyme E2E 2	-0.6898	-1.6131	9.15e-06	0.0003
ENSMUSG00000041120.6	Nbl1	neuroblastoma, suppression of tumorigenicity 1	-0.6912	-1.6146	2.7471e-05	0.0006
ENSMUSG00000052911.7	Lamb2	laminin, beta 2	-0.6937	-1.6174	3.5265e-07	2.0725e-05
ENSMUSG00000097385.1	Gm26814		-0.6964	-1.6205	9.9468e-06	0.0003
ENSMUSG00000014444.14	Piezo1	piezo-type mechanosensitive ion channel component 1	-0.6965	-1.6206	1.233e-06	5.6934e-05
ENSMUSG00000082809.3	Gm14150	tubulin, alpha 1C pseudogene	-0.7001	-1.6246	1.6964e-05	0.0004
ENSMUSG00000052062.12	Pard3b	par-3 family cell polarity regulator beta	-0.7013	-1.626	2.3125e-06	9.2231e-05
ENSMUSG00000046408.11	1700067K01Rik	RIKEN cDNA 1700067K01 gene	-0.702	-1.6267	1.8354e-05	0.0005
ENSMUSG00000037217.13	Syn1	synapsin I	-0.7027	-1.6275	4.9272e-06	0.0002
ENSMUSG00000034353.12	Ramp1	receptor (calcitonin) activity modifying protein 1	-0.7049	-1.63	4.3204e-10	1.0312e-07
ENSMUSG00000103567.1	Pcdhga5	protocadherin gamma subfamily A, 5	-0.7059	-1.6311	2.7043e-06	0.0001
ENSMUSG00000000901.13	Mmp11	matrix metallopeptidase 11	-0.7066	-1.632	6.4594e-09	7.8295e-07
ENSMUSG00000106103.1	RP24-317M4.1		-0.7098	-1.6356	9.4902e-06	0.0003
ENSMUSG00000025867.8	Cplx2	complexin 2	-0.717	-1.6438	3.0851e-07	1.8481e-05
ENSMUSG00000021806.3	Nid2	nidogen 2	-0.7183	-1.6452	1.2481e-08	1.3263e-06
ENSMUSG00000004267.14	Eno2	enolase 2, gamma neuronal	-0.7233	-1.651	7.7693e-06	0.0002
ENSMUSG00000040016.14	Ptger3	prostaglandin E receptor 3 (subtype EP3)	-0.724	-1.6518	2.3372e-06	9.298e-05
ENSMUSG00000037754.11	Ppp1r16b	protein phosphatase 1, regulatory (inhibitor) subunit 16B	-0.7251	-1.653	9.729e-06	0.0003
ENSMUSG00000103674.1	Gm37699		-0.7283	-1.6567	8.1485e-06	0.0002
ENSMUSG00000022376.7	Adcy8	adenylate cyclase 8	-0.7304	-1.659	2.494e-06	9.7713e-05
ENSMUSG00000033615.9	Cplx1	complexin 1	-0.7315	-1.6604	4.2529e-06	0.0001
ENSMUSG00000037855.13	Zfp365	zinc finger protein 365	-0.7326	-1.6617	1.6645e-06	7.1538e-05
ENSMUSG00000027562.10	Car2	carbonic anhydrase 2	-0.7339	-1.6632	8.5356e-06	0.0003
ENSMUSG00000035258.12	Abi3bp	ABI gene family, member 3 (NESH) binding protein	-0.7344	-1.6637	4.2684e-06	0.0001
ENSMUSG00000017390.13	Aldoc	aldolase C, fructose-bisphosphate	-0.7398	-1.6699	7.3608e-06	0.0002
ENSMUSG00000015143.12	Actn1	actinin, alpha 1	-0.7436	-1.6744	1.2732e-06	5.8404e-05
ENSMUSG00000026080.11	Chst10	carbohydrate sulfotransferase 10	-0.7497	-1.6814	3.074e-07	1.8481e-05
ENSMUSG00000103472.1	Pcdhga7	protocadherin gamma subfamily A, 7	-0.7517	-1.6838	8.8083e-07	4.3801e-05
ENSMUSG00000059022.12	Kcp	kielin/chordin-like protein	-0.754	-1.6864	1.3151e-06	5.9662e-05
ENSMUSG00000032186.12	Tmod2	tropomodulin 2	-0.756	-1.6888	1.0736e-06	5.1094e-05
ENSMUSG00000033152.11	Podxl2	podocalyxin-like 2	-0.7665	-1.7011	2.0402e-09	3.2972e-07
ENSMUSG00000040276.12	Pacsin1	protein kinase C and casein kinase substrate in neurons 1	-0.7714	-1.707	3.2075e-10	8.1582e-08
ENSMUSG00000021594.10	Srd5a1	steroid 5 alpha-reductase 1	-0.7732	-1.709	2.8049e-06	0.0001
ENSMUSG00000100213.1	Gm28151		-0.7809	-1.7183	2.6144e-07	1.6422e-05
ENSMUSG00000042750.7	Bex2	brain expressed X-linked 2	-0.7817	-1.7192	8.8367e-07	4.3802e-05
ENSMUSG00000006638.12	Abhd1	abhydrolase domain containing 1	-0.7826	-1.7202	1.9688e-06	8.1455e-05
ENSMUSG00000025889.11	Snca	synuclein, alpha	-0.7827	-1.7204	3.0284e-07	1.8456e-05
ENSMUSG00000067341.5	H2-Eb2	histocompatibility 2, class II antigen E beta2	-0.7864	-1.7248	1.6197e-07	1.1634e-05
ENSMUSG00000025573.4	6030468B19Rik	RIKEN cDNA 6030468B19 gene	-0.7906	-1.7298	1.8596e-12	9.949e-10
ENSMUSG00000018451.6	6330403K07Rik	RIKEN cDNA 6330403K07 gene	-0.792	-1.7315	9.1246e-07	4.4942e-05
ENSMUSG00000089998.2	Phtf1os	putative homeodomain transcription factor 1, opposite strand	-0.7953	-1.7354	4.2365e-07	2.4344e-05
ENSMUSG00000033717.5	Adra2a	adrenergic receptor, alpha 2a	-0.7998	-1.7409	6.0011e-07	3.2217e-05
ENSMUSG00000061718.10	Ppp1r1b	protein phosphatase 1, regulatory (inhibitor) subunit 1B	-0.8029	-1.7446	1.1573e-06	5.3596e-05
ENSMUSG00000039485.7	Tspyl4	TSPY-like 4	-0.8061	-1.7485	4.9986e-07	2.7599e-05
ENSMUSG00000024413.11	Npc1	Niemann Pick type C1	-0.8274	-1.7745	1.1038e-26	8.5627e-23
ENSMUSG00000046321.7	Hs3st2	heparan sulfate (glucosamine) 3-O-sulfotransferase 2	-0.8312	-1.7791	4.7598e-07	2.6757e-05
ENSMUSG00000043592.13	Unc5cl	unc-5 homolog C (C. elegans)-like	-0.8429	-1.7936	4.6573e-10	1.0785e-07
ENSMUSG00000090546.1	Cdr1	cerebellar degeneration related antigen 1	-0.8508	-1.8035	2.6122e-08	2.4414e-06
ENSMUSG00000034336.3	Ina	internexin neuronal intermediate filament protein, alpha	-0.8571	-1.8114	1.8157e-08	1.8534e-06
ENSMUSG00000090031.2	4732440D04Rik	RIKEN cDNA 4732440D04 gene	-0.8608	-1.8161	2.6445e-09	4.0667e-07
ENSMUSG00000030701.14	Plekhb1	pleckstrin homology domain containing, family B (evectins) member 1	-0.8625	-1.8182	1.2091e-07	9.0165e-06
ENSMUSG00000072720.7	Myo18b	myosin XVIIIb	-0.8787	-1.8387	9.6832e-13	5.5642e-10
ENSMUSG00000029223.10	Uchl1	ubiquitin carboxy-terminal hydrolase L1	-0.8966	-1.8616	1.9077e-08	1.9096e-06
ENSMUSG00000055430.3	Nap1l5	nucleosome assembly protein 1-like 5	-0.9251	-1.8989	1.3183e-08	1.3914e-06
ENSMUSG00000005043.11	Sgsh	N-sulfoglucosamine sulfohydrolase (sulfamidase)	-0.9361	-1.9134	1.4853e-09	2.5912e-07
ENSMUSG00000028785.10	Hpca	hippocalcin	-0.9436	-1.9234	9.7392e-09	1.0871e-06
ENSMUSG00000059493.11	Nhs	Nance-Horan syndrome (human)	-0.9722	-1.9618	3.9734e-09	5.6845e-07
ENSMUSG00000054459.6	Vsnl1	visinin-like 1	-0.9768	-1.9681	1.5283e-09	2.6346e-07
ENSMUSG00000102252.3	Snrpn	small nuclear ribonucleoprotein N	-1.0116	-2.0161	7.3664e-10	1.5874e-07
ENSMUSG00000031760.8	Mt3	metallothionein 3	-1.1185	-2.1713	1.298e-11	5.923e-09
ENSMUSG00000053310.9	Nrgn	neurogranin	-1.1648	-2.242	1.3057e-12	7.2349e-10
ENSMUSG00000036564.14	Ndrg4	N-myc downstream regulated gene 4	-1.1952	-2.2898	3.0641e-13	2.377e-10
ENSMUSG00000027273.11	Snap25	synaptosomal-associated protein 25	-1.3632	-2.5726	1.0878e-16	2.4109e-13
ENSMUSG00000024437.6	Gm8615	glucosamine-6-phosphate deaminase 1 pseudogene	-3.2515	-9.5234	4.0811e-108	6.3318e-104
